1 **Intraspecific variation and warming have comparable effects on eco-**  
2 **evolutionary dynamics.**

3

4 A. Raffard<sup>1,2\*</sup>, J. Cucherousset<sup>3</sup>, F. Santoul<sup>2</sup>, L. Di Gesu<sup>1</sup> and S. Blanchet<sup>1,3\*</sup>

5

6 <sup>1</sup> CNRS, Université Toulouse III Paul Sabatier, Station d'Écologie Théorique et  
7 Expérimentale du CNRS à Moulis, UMR-5321, F-09200 Moulis, France.

8

9 <sup>2</sup> EcoLab, Université de Toulouse, CNRS, INPT, UPS, Toulouse, France.

10

11 <sup>3</sup> Laboratoire Évolution and Diversité Biologique (EDB UMR 5174), Université de  
12 Toulouse, CNRS, IRD, UPS, 118 route de Narbonne, Toulouse 31062, France.

13

14 **Classification:** *Biological Sciences / Ecology*

15

16 **Abstract**

17 Rapid evolutionary divergences within species can affect the way organisms shape  
18 their environment, which in turn can affect the evolutionary trajectories of species.  
19 These eco-evolutionary feedbacks have recently been proved, but their relevance  
20 compared to that of key environmental drivers in the dynamics of biological systems  
21 is still unknown. Here, we filled this gap in knowledge by quantifying the effects of  
22 intraspecific variation on ecological processes and evolutionary trajectories and by  
23 comparing these effects to those induced by a 2°C warming. We used a common  
24 gardening experiment with simultaneous variations in the genetic and phenotypic  
25 characters of a widespread freshwater fish species (the European minnow, *Phoxinus*  
26 *phoxinus*) and in the ecosystem temperature. We showed that intraspecific variation  
27 led to eco-evolutionary feedbacks that were as strong as the eco-evolutionary  
28 consequences of ecosystem warming. Specifically, we found that variations in two  
29 heritable phenotypic traits (body size and growth rate) in adult minnows led to  
30 ecological changes in the environment that subsequently modulated the evolutionary  
31 trajectories of juvenile minnows. Importantly, the eco-evolutionary consequences of  
32 intraspecific variation were different and independent from those induced by  
33 warming. We conclude that eco-evolutionary feedbacks are not biologically  
34 negligible and that intraspecific variation is an indisputable driver of both ecological  
35 and evolutionary dynamics.

36

37 **Significance statement**

38 Global changes are directly modifying the functioning of ecosystems and the  
39 evolution of species. Phenotypic and genetic variation observed within species  
40 (intraspecific variation) has recently also been shown to alter biological dynamics and

41 is threatened by global changes. It is hence of utmost importance to quantify the  
42 relative importance of intraspecific variation and global changes (here considering  
43 warming) on biological dynamics. Here, we demonstrate that intraspecific variation  
44 affects ecosystem functioning as intensively as a warming of 2°C. The ecosystem  
45 changes induced by intraspecific variation were strong enough to generate feedbacks  
46 in the evolution of organisms, with a magnitude similar to that of warming.  
47 Intraspecific variation should be a major target of conservation plans because it  
48 affects biological dynamics as much as contemporary warming.  
49

## 50 **Introduction**

51 Reciprocal interactions between ecological and evolutionary dynamics occurring over  
52 contemporary time scales (*eco-evolutionary dynamics*) have been increasingly studied  
53 in the last two decades<sup>1-4</sup>. Theory predicts that evolutionary diversification within a  
54 species can affect ecological processes such as primary productivity, resulting in  
55 environmental changes that can act as new selective pressures modulating the  
56 evolution of organisms<sup>5-7</sup>. These reciprocal interactions can generate eco-evolutionary  
57 feedbacks linking species evolution and ecosystem functioning, providing an  
58 integrative and temporally dynamic framework for understanding biological systems<sup>8</sup>.  
59 Although the study of eco-evolutionary feedback loops has long been conceptual<sup>3,5,8</sup>,  
60 recent experimental studies have demonstrated the existence of these process<sup>9-12</sup>.  
61 However, the relative importance of eco-evolutionary feedbacks in the dynamics of  
62 natural ecosystems has been questioned<sup>2,3</sup>.

63 To answer this question, it is important to determine whether eco-evolutionary  
64 feedbacks are negligible compared to key environmental drivers affecting both  
65 ecological and evolutionary dynamics, such as temperature, nutrient availability,  
66 predation or parasitism<sup>2,13</sup>. Recent investigations have revealed that intraspecific  
67 variation (emerging from evolutionary diversification) can affect ecological processes  
68 with an intensity similar to that of key environmental drivers<sup>14-16</sup>. However, whether  
69 the effects of intraspecific variation on evolutionary dynamics (mediated by the  
70 effects of intraspecific variation on ecological processes) are similar to or stronger  
71 than those of indisputable environmental drivers is still unknown. Addressing this  
72 question is fundamental to determining the relative contribution of eco-evolutionary  
73 feedbacks in driving the responses of biological systems to varying environmental  
74 conditions<sup>13</sup>.

75           Here, we experimentally quantified the consequences of intraspecific variation  
76 on ecological processes and subsequent evolutionary trajectories (i.e., eco-  
77 evolutionary feedbacks) and then compared these consequences to the ecological and  
78 evolutionary consequences of warming. Temperature is a key abiotic factor that  
79 strongly varies at the landscape scale, directly affects key ecological functions such  
80 primary productivity and ecosystem respiration<sup>17-19</sup>, and imposes a strong selective  
81 pressure on organism traits<sup>20-22</sup>. We ran a two-phase “common gardening experiment”  
82 (*sensu*<sup>8,11</sup>, Fig. 1) and manipulated (i) intraspecific variation in a freshwater fish  
83 (European minnow, *Phoxinus phoxinus*) by selecting individuals from six  
84 evolutionary and functionally distinct populations (i.e., differences in genotypes and  
85 functional traits, see Methods and Fig. S1 and S2) and (ii) water temperature by  
86 setting mesocosms varying by 2°C throughout the experiment (Fig. S3). An increase  
87 in temperature of 2°C represents the general warming expectations for freshwaters  
88 over the next 40 years<sup>23</sup>. During the first experimental phase (*ecological effects*, 10-  
89 weeks), we compared the strengths of the effects of intraspecific variation among  
90 adult minnows, to the strengths of the effects of warming on prey community  
91 structure and ecosystem functions (Fig. 1). Adults were then removed from the  
92 mesocosms and replaced by juveniles with a common origin for the second  
93 experimental phase (*evolutionary effects*, 11-weeks). We tested how the ecological  
94 variations induced during the first phase (due to intraspecific variation and/or  
95 warming) affected the evolutionary trajectories (fitness and performance) of juveniles.

96

## 97 **Results**

98           In the first phase, we found that the effects of intraspecific variation in adult  
99 minnows on ecological processes (measured over all ecological parameters) were at

100 least as strong as those of warming on ecological processes (mean effect size (MES)  $\pm$   
101 standard error =  $0.103 \pm 0.018$  and  $MES \pm SE = 0.078 \pm 0.036$  for intraspecific  
102 variation and warming, respectively;  $t = 0.624$ , d.f = 18,  $p = 0.540$ , Fig. 2).  
103 Nonetheless, the effects were heterogeneous across ecological parameters (Fig. 2b,  
104 Fig. S4). For instance, intraspecific variation had the strongest ecological effect on the  
105 abundance of Cladocera, whereas warming had a particularly strong ecological effect  
106 on decomposition rate (Fig. 2b, Fig. S5 and S6). A single interaction term between  
107 warming and intraspecific variation was significant (i.e., for benthic primary  
108 productivity,  $F = 10.831$ , d.f = 5,52,  $p = 0.022$ ), indicating that the ecological effects  
109 of intraspecific variation were not temperature-dependent for most ecological  
110 parameters. The body mass and growth rate of minnows, two functionally important  
111 traits differing among minnow populations (although the later was also affected by  
112 experimental temperature, Fig. S2), were included in a path analysis testing the direct  
113 and indirect relationships among trait variation, warming and ecological parameters.  
114 We found that intraspecific variation in these two functional traits affected ecological  
115 processes as much as warming and that body mass was the most influential functional  
116 trait (Fig. 3). We further found that the intraspecific trait variation acted both directly  
117 and indirectly on ecological parameters (Fig. 3b). For instance, adult body mass  
118 affected the abundance of Copepoda directly, subsequently leading to an indirect  
119 effect on the abundance of Cladocera (Table 1, Fig. 3a). The ecological effects of  
120 warming were mainly direct (67%), although some indirect effects were also observed  
121 (Fig. 3b). For instance, warming directly increased *Bivalvia* abundance, positively  
122 affecting the abundance of Copepoda and the size of Cladocera, hence representing an  
123 indirect effect of warming on the zooplankton community (Fig. 3).

124 In the second phase (Fig. 1), we found that the strength of the effect sizes of  
125 intraspecific variation and warming on the fitness proxies (survival, growth rate and  
126 body condition) were similar ( $MES \pm SE = 0.044 \pm 0.004$  and  $MES \pm SE = 0.032 \pm$   
127  $0.016$  for intraspecific variation and warming, respectively,  $t = 0.665$ ,  $d.f = 4$ ,  $p =$   
128  $0.542$ , Fig. 2). Notably, the average effect sizes of intraspecific variation and warming  
129 on the evolutionary parameters were half the intensity of those on ecological  
130 parameters (Fig. 2), indicating that evolutionary dynamics were less affected than  
131 ecological processes by the initial treatments. Nonetheless, we observed eco-  
132 evolutionary feedbacks since the juvenile growth rate was related to the ecological  
133 parameters (benthic primary productivity, decomposition rate and Cladocera  
134 abundance), which were controlled by intraspecific variation (Fig. 3a). Juvenile  
135 survival was also related to juvenile growth rate (density-dependent growth rate) and  
136 was indirectly related to warming. We also identified a direct relationship between  
137 adult trait variation and juvenile growth rate (Fig. 3), which was unexpected given  
138 that the adults were removed from the tanks before the juveniles were introduced.  
139 This result indicates interspecific variation had unmeasured indirect effects (mediated  
140 by ecological changes) on evolutionary dynamics. Juvenile survival was positively  
141 related to the body size of Cladocera and negatively related to temperature (i.e.,  
142 survival increased as temperature decreased). Juvenile body condition covaried with  
143 both juvenile survival and growth rate and was lower when the abundance of  
144 *Bivalvia*, which was directly affected by temperature, was high (Fig. 3).

145

## 146 **Discussion**

147 We found that the ecological consequences of intraspecific variation and  
148 warming were similar in strength but acted on different ecological processes. Adult

149 minnows from evolutionary and phenotypically distinct populations modulated both  
150 the abundance and the size of their prey (zooplankton Cladocera), probably because  
151 these populations have different prey consumption and selectivity characters. In  
152 contrast, warming strongly accelerated leaf litter decomposition, probably because  
153 warmer temperatures stimulate bacterial activity<sup>18,20</sup>. The evolutionary effects of  
154 intraspecific variation (resulting from eco-evolutionary feedbacks) and warming were  
155 also similar in strength, regardless of the fitness traits investigated. For instance, the  
156 survival of juvenile minnows was higher the low-temperature than the high-  
157 temperature treatment (which is expected given that minnows inhabit relatively cold  
158 rivers<sup>24</sup>), whereas the growth rate of juveniles differed depending on the adult  
159 minnow population introduced at the onset of the experiment. Notably, the effects of  
160 warming on the evolutionary trajectories of juveniles might be overestimated  
161 compared to the effects of intraspecific variation, since the former represents the  
162 cumulative results of both second-phase direct effects and first-phase indirect effects  
163 mediated by ecological changes. Overall, our results demonstrate that intraspecific  
164 variation can affect the ecological and evolutionary dynamics of biological systems as  
165 much as warming does, although in different directions. Thus, eco-evolutionary  
166 feedbacks occur in this type of biological system and significantly modulate the  
167 whole biological dynamics of ecosystems.

168         Here, the eco-evolutionary feedback comprised indirect effects of intraspecific  
169 variation among adult minnows on the evolutionary trajectory of juveniles, which  
170 were mediated by the direct consequences of adult minnows on the ecological theatre.  
171 Currently, very few studies have demonstrated the existence of eco-evolutionary  
172 feedback, and most of have focused on model organisms<sup>9-12</sup>. By focusing on a non  
173 model organism, our study extends the taxonomic scope of eco-evolutionary feedback



174 loops and suggests that this process does not concern only species with strong eco-  
175 evolutionary divergences<sup>8</sup>. We further identified two heritable traits (body mass and  
176 growth rate<sup>25,26</sup>) that partially initiate these eco-evolutionary feedbacks and vary  
177 between adult minnows originating from environmentally and evolutionary distinct  
178 populations. For instance, the zooplankton community was strongly impacted by trait  
179 variability, probably through diet specialization. In turn, juveniles performed better  
180 (i.e., higher growth rate) in the mesocosms with a higher abundance of zooplankton,  
181 confirming that eco-evolutionary feedbacks could arise from a change in prey  
182 availability<sup>9</sup>. Previous studies have identified growth rate and body mass as important  
183 traits for ecological processes<sup>27–29</sup>, and we here provide novel insights into the indirect  
184 evolutionary consequences of these traits.

185         Interestingly, intraspecific variation and warming acted additively but not  
186 interactively on ecological and evolutionary dynamics. Indeed, we identified only one  
187 significant interaction between intraspecific variation and warming on benthic  
188 primary productivity, indicating that the effect of intraspecific variation on benthic  
189 primary productivity dynamics was temperature-dependent. This finding confirms  
190 that the ecological consequences of intraspecific variation are often independent from  
191 the abiotic context<sup>15</sup>, which might also be the case for eco-evolutionary feedbacks.  
192 This independence is surprising, since local adaptation for specific fitness traits and/or  
193 for reaction norms often leads to strong context dependency in the responses of  
194 organisms to local abiotic conditions<sup>30,31</sup>, and we may have observed cascading  
195 interactive effects of intraspecific variation on ecological and evolutionary  
196 dynamics<sup>32,33</sup>. This finding is important because the absence of strong interactive  
197 effects reduces biological complexities and may therefore improve our ability to

198 forecast the ecological and evolutionary consequences of environmental and  
199 biodiversity changes<sup>34</sup>.

200 In conclusion, we demonstrated for the first time that the magnitude of eco-  
201 evolutionary feedbacks was as strong as the effects of warming on ecological and  
202 evolutionary dynamics; thus, eco-evolutionary feedbacks are not biologically  
203 negligible. Intraspecific variation in major heritable traits such as growth rate or body  
204 mass is commonplace in the wild and can arise via various evolutionary processes  
205 including natural selection and genetic drift<sup>35</sup>. Our study proves that intraspecific  
206 variation is an indisputable driver of biological dynamics (at both the ecological and  
207 evolutionary scale) that should not be considered noise in ecosystems. Current  
208 environmental changes are rapid and can directly affect ecosystem functioning<sup>18</sup>.  
209 These changes can also directly modulate the distribution of intraspecific variation in  
210 landscapes and thereby indirectly effect the eco-evolutionary dynamics of biological  
211 systems<sup>10,11</sup>. These results reinforce recent reports that changes in intraspecific  
212 variations of wild populations (e.g., harvest<sup>36</sup> or pollution<sup>37</sup>) could be as harmful as  
213 considerable environmental changes (e.g., warming) to biological dynamics and that  
214 this facet of biodiversity should therefore be conserved adequately<sup>38,39</sup>.

215

## 216 **Methods**

### 217 *Study species*

218 European minnow (*Phoxinus phoxinus*) was used as the model species. *P. phoxinus* is  
219 a small-bodied (maximum length: ~80 mm, mean generation time: ~2 years) cyprinid  
220 fish species widely distributed in Western Europe. *P. phoxinus* lives in relatively cold  
221 waters, mainly in streams and rivers but also in mountain lakes<sup>24,39</sup>. It is a generalist

222 species that feeds on small invertebrates, algae, zooplankton and small fish larvae<sup>40–</sup>  
223 <sup>42</sup>.

224 In September 2016, we collected adult minnows by electrofishing in six rivers  
225 in southwestern France (Fig. S1). We selected populations that were isolated  
226 geographically (minimal riparian distance among sites = 64 km, mean  $\pm$  SD = 343 km  
227  $\pm$  182) and had distinct environments (Fig. S7) to favor both genetic and phenotypic  
228 divergences among populations. Accordingly, the mean genetic divergence among  
229 populations was  $F_{st} = 0.162$  (measured using 17 microsatellites, min-max = 0.043–  
230 0.313), indicating a high evolutionary distinctiveness among the populations. The  
231 body mass (a highly heritable<sup>25,26</sup> and important functional trait<sup>43,44</sup>, Fig. S2) of the  
232 sampled populations also varied, as did two other important functional traits<sup>20,45–47</sup>:  
233 the metabolic (min-max = 0.1388–0.2737 mg O<sub>2</sub>.g<sup>-1</sup>.h<sup>-1</sup>,  $F = 14.599$ , d.f = 5,188,  $p <$   
234 0.001) and ammonium excretion (min-max = 17.02–43.48  $\mu$ g NH<sub>4</sub><sup>+</sup>.g<sup>-1</sup>.L<sup>-1</sup>.h<sup>-1</sup>,  $F =$   
235 4.695, d.f = 5,175,  $p < 0.001$ , unpublished data) rates. All fish collections and  
236 husbandry for adults and juveniles were conducted in accordance with sampling  
237 permits obtained from local authorities (25-08-2016, 24-05-2016, 09-273, SA-013-  
238 PB-092, A09-3). Fish from different populations were reared separately for ~6  
239 months in 1100 L outdoor tanks to minimize previous environmental effects on  
240 phenotypes. During rearing, the fish were fed with a mixture of pelletized food and  
241 dead chironomids until the start of the experiment.

242

243 *Phase 1: effects of intraspecific variation and temperature on ecological processes*

244 The experiment consisted of 72 replicated mesocosms placed in a greenhouse with a  
245 12:12 h light-dark photoperiod. Mesocosms were filled with 100 L of tap water and 1

246 cm of gravel covering the bottom of each tank. Tanks were covered with a 1 cm  
247 plastic mesh net to prevent fish escapes. Nutrients were added to the mesocosms  
248 using 5 mL of solution containing nitrogen and phosphorus (ratio N: P: K = 3.3: 1.1:  
249 5.8) on December 2<sup>nd</sup> 2016. Each mesocosm was then inoculated with 200 mL of a  
250 concentrated solution of phytoplankton from a unique lake origin (Lake Lamartine,  
251 France 43°30'21.5"N, 1°20'32.7"E) on December 12<sup>th</sup> 2016. Two months later  
252 (February 15<sup>th</sup> 2017), an additional 200 mL of concentrated solution of zooplankton  
253 from the same lake was added to each mesocosm. Finally, we inoculated each  
254 mesocosm with sediment and macroinvertebrates (i.e., mainly Gastropoda and  
255 Bivalvia) from Lake Lamartine.

256 Each tank was assigned to one of twelve treatments according to a full-  
257 factorial design with intraspecific variation (i.e., population origin, six levels  
258 corresponding to each population) and temperature (two levels: low and high  
259 temperature) as the main factors (Fig. 1). Each treatment was replicated six times.  
260 Water temperature was controlled and adjusted using a *Blue Marine*® water chiller  
261 and a stainless steel coil placed in each tank through which a flux of water  
262 (independent from the water of the tanks) flowed at either 18°C or 21°C. Natural  
263 seasonal temperature variations occurred; on average, the low and high water  
264 temperature treatments differed by 2.08°C according to seasonal variations (Fig. S3).

265 In March 2017, adult fish were weighed to the nearest 0.01 g and a single fish  
266 was introduced to each mesocosm. This individual-based approach prevented the  
267 experimental ecosystems from collapsing due to the over-density of top consumers  
268 and allowed the ecological effects of individual phenotypes to be measured. After 73  
269 days (Fig. 1), each fish was removed, weighed and euthanized in a solution of  
270 benzocaine at 25 mg.L<sup>-1</sup>. The growth rate (%.day<sup>-1</sup>) of the adults was calculated

271 as  $SGR = \frac{\ln(W_f) - \ln(W_i)}{T} * 100$ , where  $W_f$  and  $W_i$  are the final and initial body masses,  
272 respectively, and  $T$  is time interval between two measurements (in days).  
273 Concomitantly, we measured multiple community and ecosystem parameters to  
274 evaluate differences in ecological processes among treatments.

275 (i) Pelagic algae stock was assessed as a proxy of pelagic primary  
276 productivity. Measurements were performed using a portable spectrometer  
277 (AlgaeTorch, bbe Moldaenke®) to assess the chlorophyll-a concentration ( $\mu\text{g/L}$ ) in  
278 the water column. Two measurements were taken in each mesocosm and were  
279 averaged for the analyses.

280 (ii) Benthic algae stock was assessed as a proxy of the benthic primary  
281 productivity using a portable spectrometer (BenthosTorch, bbe Moldaenke®). The  
282 chlorophyll-a concentration ( $\mu\text{g/cm}^2$ ) was measured on two tiles (20 x 20 cm) placed  
283 in the mesocosms the day before the start of the experiment. These measurements  
284 were averaged for analyses.

285 (iii) The abundance of filamentous algae was quantified. Filamentous algae  
286 cover (%) was visually estimated by two operators, and values were averaged for  
287 analyses.

288 (iv) Zooplankton community was assessed by filtering 5 L of water through a  
289 200  $\mu\text{m}$  sieve. Samples was conserved in a 70% ethanol solution and subsequently  
290 identified to the order or family levels, including Copepoda (i.e., Cyclopoida and  
291 Calanoida) and Cladocera (i.e., Daphniidae, Chydoridae and Bosminidae).  
292 Zooplankton size was assessed by measuring 10 individuals of each order and family  
293 level from each mesocosm to the nearest 0.001 mm using ImageJ®.

294 (v) Decomposition rate was measured by quantifying the mass loss of black  
295 poplar (*Populus nigra*, a dominant riparian tree in southern France) abscised leaves<sup>48</sup>.

296 One day before the start of the experiment, 4 g of air-dried leaves were put in each  
297 mesocosm within a coarse mesh (1 x 1 cm) bag. At the end of the phase 1, the  
298 remaining leaf material was removed from the mesocosms, rinsed with tap water,  
299 oven dried at 60°C for three days and weighed to the nearest 0.001 g to assess the loss  
300 of biomass. The decomposition rate was calculated as  $k = -\frac{\ln(X)}{t}$ <sup>48</sup>, where  $X$  is the  
301 proportion of litter remaining after phase 1 and  $t$  is the elapsed time in days.

302 (vi) Macroinvertebrates (> 1 mm, essentially molluscs) were collected from  
303 the mesh bags used to measure decomposition rates, conserved in a 70% ethanol  
304 solution, and identified as Bivalvia or Gastropoda.

305 (vii) Abiotic parameters of the water [pH, specific conductance (μS), oxygen  
306 concentration (mg.L<sup>-1</sup>) and turbidity (NTU)] were measured with a multiparameters  
307 probe (YSI Pro DSS Water Quality Meter®). We summarized these parameters using  
308 principal component axis (PCA) (package ade4 in R<sup>49</sup>). We selected the first axis of  
309 the PCA as the synthetic variable. This axis explained 60% of the variance and was  
310 correlated to the oxygen concentration (loading component: -0.95), pH (-0.93),  
311 specific conductance (0.70) and, to a lesser extent, turbidity (0.25).

312

### 313 *Phase 2: effect of ecological differences on juvenile evolution*

314 After the removal of adult fish on June 13<sup>th</sup> 2017, 45 juvenile minnows were  
315 introduced to each mesocosm. We used juveniles from a unique origin (i.e., fish farm,  
316 *Amorvif EURL*) to control for potential genetic effects. Juveniles were introduced as  
317 soon as possible after hatching to increase the possibility of differential mortality  
318 and/or ontogenetic plasticity. Therefore, juveniles were introduced when they were  
319 only two weeks old as stage III larvae<sup>50</sup> (Fig. S8). They were not manipulated (i.e.,  
320 weighted and/or measured) before being randomly introduced in the mesocosms to

321 limit potential mortality. The juveniles were removed from the mesocosms 79 days  
322 later, and we measured several proxies for their fitness. Individuals were counted to  
323 assess survival, weighed to the nearest 0.001 g to assess growth rate (assuming all  
324 juveniles had the same initial body mass, we used the final body mass of juveniles as  
325 a measure of growth rate), and measured in length to the nearest 0.1 mm (using  
326 ImageJ) to assess the body condition, which was calculated as the residuals of the  
327 relationship between individual body mass and length.

328

### 329 *Statistical analyses*

330 Two adult individuals died before the end of phase 1, so we discarded these two  
331 replicates from the analyses. Moreover, we identified six tanks in which crayfish had  
332 been inadvertently introduced; we discarded these six replicates because crayfish are  
333 known to have disproportionately strong impacts on ecosystems<sup>48</sup>. As such, the final  
334 analyses were run on 64 replicates.

335 First, we compared the magnitude of the effects of intraspecific variation and  
336 temperature on ecological (phase 1) and evolutionary (phase 2) dynamics. To do so,  
337 we used a meta-analytic approach consisting of first running linear models linking  
338 each ecological or evolutionary parameter (dependent variables) to the explicative  
339 variables, i.e., intraspecific variation (categorical factor, six levels), temperature  
340 (categorical factor, two levels) and the resulting two-term interaction. The interaction  
341 term was removed when nonsignificant because it prevents the interpretation of  
342 simple terms<sup>51</sup>. From these linear models, we calculated the standardized effect sizes  
343 eta squared<sup>52</sup> ( $\eta^2$ ) as follows:  $\eta^2 = SS_x/SS_{tot}$ , where  $SS_x$  is the sum of squares for the  
344 effect of interest (intraspecific variation, temperature or the interaction term, if  
345 significant) and  $SS_{tot}$  is the total sum of squares. Sums of squares were extracted from

346 type II analysis of variance when the interaction was not in the model and from type  
347 III analysis of variance when the interaction was significant<sup>53</sup>. Finally, the MES  
348 values of intraspecific variation and temperature across the ecological or evolutionary  
349 parameters were compared using t-test.

350       Next, we assessed the direct and indirect links between intraspecific variation,  
351 temperature, and the ecological and evolutionary parameters using a causal analysis.  
352 Since we aimed at identifying the mechanisms by which the mesocosms diverged, we  
353 included the body mass and the growth rate of adult fish from phase 1 because these  
354 two traits are known to drive ecological processes<sup>43</sup>. We used path analyses<sup>54–56</sup> to set  
355 a full model based on biologically rational paths and the visual inspection of the  
356 variance-covariance matrix, and all variables were scaled to the mean to facilitate the  
357 comparison. This full model was then simplified by removing sequentially weak  
358 and/or nonsignificant paths until reaching a model that was correct statistically (i.e., a  
359 model that best fit the observed covariance matrix based on the maximum likelihood  
360  $\chi^2$  statistic<sup>55</sup>), while leading to the lowest Akaike Information Criteria (AIC) value.  
361 We finally extracted the absolute values of path coefficients from the final model to  
362 tease apart the direct and indirect effects of body mass, growth rate and temperature  
363 on the ecological and evolutionary parameters. Statistical analyses were performed  
364 using R software<sup>57</sup>, and path analyses were run using Amos<sup>58</sup>.

365

## 366 **References**

- 367 1. Hendry, A. P. *Eco-Evolutionary Dynamics*. (2016).
- 368 2. Schoener, T. W. The Newest Synthesis: Understanding the Interplay of  
369       Evolutionary and Ecological Dynamics. *Science* **331**, 426–429 (2011).
- 370 3. Thompson, J. N. Rapid evolution as an ecological process. *Trends Ecol. Evol.* **13**,  
371       329–332 (1998).
- 372 4. Whitham, T. G. *et al.* Community and ecosystem genetics: a consequence of the  
373       extended phenotype. *Ecology* **84**, 559–573 (2003).



- 374 5. Kokko, H. & López-Sepulcre, A. The ecogenetic link between demography and  
375 evolution: can we bridge the gap between theory and data? *Ecol. Lett.* **10**,  
376 773–782 (2007).
- 377 6. Post, D. M. & Palkovacs, E. P. Eco-evolutionary feedbacks in community and  
378 ecosystem ecology: interactions between the ecological theatre and the  
379 evolutionary play. *Philos. Trans. R. Soc. B-Biol. Sci.* **364**, 1629–1640 (2009).
- 380 7. Odling-Smee, J., Erwin, D. H., Palkovacs, E. P., Feldman, M. W. & Laland, K. N.  
381 Niche Construction Theory: A Practical Guide for Ecologists. *Q. Rev. Biol.*  
382 **88**, 3–28 (2013).
- 383 8. Matthews, B. *et al.* Toward an integration of evolutionary biology and ecosystem  
384 science: Integration of evolutionary biology and ecosystem science. *Ecol. Lett.*  
385 **14**, 690–701 (2011).
- 386 9. Best, R. J. *et al.* Transgenerational selection driven by divergent ecological  
387 impacts of hybridizing lineages. *Nat. Ecol. Evol.* **1**, 1757–1765 (2017).
- 388 10. Brunner, F. S., Anaya-Rojas, J. M., Matthews, B. & Eizaguirre, C. Experimental  
389 evidence that parasites drive eco-evolutionary feedbacks. *Proc. Natl. Acad.*  
390 *Sci.* **114**, 3678–3683 (2017).
- 391 11. Matthews, B., Aebischer, T., Sullam, K. E., Lundsgaard-Hansen, B. & Seehausen,  
392 O. Experimental Evidence of an Eco-evolutionary Feedback during Adaptive  
393 Divergence. *Curr. Biol.* **26**, 483–489 (2016).
- 394 12. Turcotte, M. M., Reznick, D. N. & Daniel Hare, J. Experimental Test of an Eco-  
395 Evolutionary Dynamic Feedback Loop between Evolution and Population  
396 Density in the Green Peach Aphid. *Am. Nat.* **181**, S46–S57 (2013).
- 397 13. Rudman, S. M. *et al.* What genomic data can reveal about eco-evolutionary  
398 dynamics. *Nat. Ecol. Evol.* **2**, 9–15 (2018).
- 399 14. Burkle, L. A., Souza, L., Genung, M. A. & Crutsinger, G. M. Plant genotype,  
400 nutrients, and G X E interactions structure floral visitor communities.  
401 *Ecosphere* **4**, UNSP 113 (2013).
- 402 15. El-Sabaawi, R. W. *et al.* Intraspecific phenotypic differences in fish affect  
403 ecosystem processes as much as bottom-up factors. *Oikos* **124**, 1181–1191  
404 (2015).
- 405 16. Des Roches, S. *et al.* The ecological importance of intraspecific variation. *Nat.*  
406 *Ecol. Evol.* **2**, 57–64 (2018).
- 407 17. Yvon-Durocher, G., Jones, J. I., Trimmer, M., Woodward, G. & Montoya, J. M.  
408 Warming alters the metabolic balance of ecosystems. *Philos. Trans. R. Soc. B*  
409 *Biol. Sci.* **365**, 2117–2126 (2010).
- 410 18. Yvon-Durocher, G. *et al.* Five Years of Experimental Warming Increases the  
411 Biodiversity and Productivity of Phytoplankton. *PLoS Biol* **13**, e1002324  
412 (2015).
- 413 19. Yvon-Durocher, G. & Allen, A. P. Linking community size structure and  
414 ecosystem functioning using metabolic theory. *Philos. Trans. R. Soc. B Biol.*  
415 *Sci.* **367**, 2998–3007 (2012).
- 416 20. Brown, J. H., Gillooly, J. F., Allen, A. P., Savage, V. M. & West, G. B. Toward a  
417 metabolic theory of ecology. *Ecology* **85**, 1771–1789 (2004).
- 418 21. Parmesan, C. Ecological and Evolutionary Responses to Recent Climate Change.  
419 *Annu. Rev. Ecol. Evol. Syst.* **37**, 637–669 (2006).
- 420 22. Rey, O., Danchin, E., Mirouze, M., Loot, C. & Blanchet, S. Adaptation to Global  
421 Change: A Transposable Element–Epigenetics Perspective. *Trends Ecol. Evol.*  
422 **31**, 514–526 (2016).

- 423 23. IPCC. Climate Change 2014: Synthesis Report. Contribution of Working Groups  
424 I, II and III to the Fifth Assessment Report of the Intergovernmental Panel on  
425 Climate Change (eds Core Writing Team, Pachauri, R.K., Meyer, L.A.).  
426 (2014).
- 427 24. Keith, P., Persat, H., Feunteun, E. & Allardi, J. *Les poissons d'eau douce de*  
428 *France*. (2011).
- 429 25. Heath, D. D., Fox, C. W. & Heath, J. W. Maternal effects on offspring size:  
430 variation through early development of chinook salmon. *Evolution* **53**, 1605–  
431 1611 (1999).
- 432 26. Thériault, V., Garant, D., Bernatchez, L. & Dodson, J. J. Heritability of life-  
433 history tactics and genetic correlation with body size in a natural population of  
434 brook charr (*Salvelinus fontinalis*). *J. Evol. Biol.* **20**, 2266–2277 (2007).
- 435 27. Rudolf, V. H. W. & Rasmussen, N. L. Population structure determines functional  
436 differences among species and ecosystem processes. *Nat. Commun.* **4**, (2013).
- 437 28. Rudolf, V. H. & Rasmussen, N. L. Ontogenetic functional diversity: Size  
438 structure of a keystone predator drives functioning of a complex ecosystem.  
439 *Ecology* **94**, 1046–1056 (2013).
- 440 29. Woodward, G. *et al.* Body size in ecological networks. *Trends Ecol. Evol.* **20**,  
441 402–409 (2005).
- 442 30. Kawecki, T. J. & Ebert, D. Conceptual issues in local adaptation. *Ecol. Lett.* **7**,  
443 1225–1241 (2004).
- 444 31. Blanquart, F., Kaltz, O., Nuismer, S. L. & Gandon, S. A practical guide to  
445 measuring local adaptation. *Ecol. Lett.* **16**, 1195–1205 (2013).
- 446 32. Gillooly, J. F. Effects of Size and Temperature on Metabolic Rate. *Science* **293**,  
447 2248–2251 (2001).
- 448 33. Rosenblatt, A. E. & Schmitz, O. J. Climate Change, Nutrition, and Bottom-Up  
449 and Top-Down Food Web Processes. *Trends Ecol. Evol.* (2016).  
450 doi:10.1016/j.tree.2016.09.009
- 451 34. Beckage, B., Gross, L. J. & Kauffman, S. The limits to prediction in ecological  
452 systems. *Ecosphere* **2**, art125 (2011).
- 453 35. Lowe, W. H., Kovach, R. P. & Allendorf, F. W. Population Genetics and  
454 Demography Unite Ecology and Evolution. *Trends Ecol. Evol.* **32**, 141–152  
455 (2017).
- 456 36. Palkovacs, E. P., Moritsch, M. M., Contolini, G. M. & Pelletier, F. Ecology of  
457 harvest-driven trait changes and implications for ecosystem management.  
458 *Front. Ecol. Environ.* **16**, 20–28 (2018).
- 459 37. Brodin, T., Fick, J., Jonsson, M. & Klaminder, J. Dilute Concentrations of a  
460 Psychiatric Drug Alter Behavior of Fish from Natural Populations. *Science*  
461 **339**, 814–815 (2013).
- 462 38. Paz-Vinas, I. *et al.* Systematic conservation planning for intraspecific genetic  
463 diversity. (2018). doi:10.1101/105544
- 464 39. Mimura, M. *et al.* Understanding and monitoring the consequences of human  
465 impacts on intraspecific variation. *Evol. Appl.* **10**, 121–139 (2016).
- 466 40. Collin, H. & Fumagalli, L. Evidence for morphological and adaptive genetic  
467 divergence between lake and stream habitats in European minnows (*Phoxinus*  
468 *phoxinus*, Cyprinidae). *Mol. Ecol.* **20**, 4490–4502 (2011).
- 469 41. Frost, W. E. The Natural History of the Minnow, *Phoxinus phoxinus*. *J. Anim.*  
470 *Ecol.* **12**, 139 (1943).
- 471 42. Miró, A., Sabás, I. & Ventura, M. Large negative effect of non-native trout and  
472 minnows on Pyrenean lake amphibians. *Biol. Conserv.* **218**, 144–153 (2018).

- 473 43. Rudolf, V. H. W., Rasmussen, N. L., Dibble, C. J. & Van Allen, B. G. Resolving  
474 the roles of body size and species identity in driving functional diversity.  
475 *Proc. R. Soc. B Biol. Sci.* **281**, 20133203 (2014).
- 476 44. Raffard, A. *et al.* The functional syndrome: linking individual trait variability to  
477 ecosystem functioning. *Proc. R. Soc. B Biol. Sci.* **284**, 20171893 (2017).
- 478 45. Bassar, R. D. *et al.* Local adaptation in Trinidadian guppies alters ecosystem  
479 processes. *Proc. Natl. Acad. Sci.* **107**, 3616–3621 (2010).
- 480 46. McIntyre, P. B. *et al.* Fish distributions and nutrient cycling in streams: can fish  
481 create biogeochemical hotspots. *Ecology* **89**, 2335–2346 (2008).
- 482 47. Hildrew, A. G., Raffaelli, D. & Edmonds-Browns, R. *Body Size: the Structure*  
483 *and Function of Aquatic Ecosystems.* (2007).
- 484 48. Alp, M., Cucherousset, J., Buoro, M. & Lecerf, A. Phenological response of a key  
485 ecosystem function to biological invasion. *Ecol. Lett.* **19**, 519–527 (2016).
- 486 49. Chessel, D., Dufour, A. B. & Dray, S. ade4: Analysis of Ecological Data:  
487 Exploratory and Euclidean methods in Multivariate data analysis and  
488 graphical display. R package version. 1–4 (2007).
- 489 50. Pinder, A. *Keys to larval and juvenile stages of coarse fishes from fresh waters in*  
490 *the British isles.* (2001).
- 491 51. Nakagawa, S. & Cuthill, I. C. Effect size, confidence interval and statistical  
492 significance: a practical guide for biologists. *Biol. Rev.* **82**, 591–605 (2007).
- 493 52. Levine, T. & Hullett, C. Eta squared, partial eta squared, and misreporting of  
494 effect size in communication research. *Hum. Commun. Res.* **28**, 612–625  
495 (2002).
- 496 53. Langsrud, O. ANOVA for unbalanced data: Use Type II instead of Type III sums  
497 of squares. 5
- 498 54. Duffy, J. E., Lefcheck, J. S., Stuart-Smith, R. D., Navarrete, S. A. & Edgar, G. J.  
499 Biodiversity enhances reef fish biomass and resistance to climate change.  
500 *Proc. Natl. Acad. Sci.* **113**, 6230–6235 (2016).
- 501 55. Grace, J. B. *Structural equation modeling and natural systems.* (2006).
- 502 56. Grace, J. B. *et al.* Integrative modelling reveals mechanisms linking productivity  
503 and plant species richness. *Nature* **529**, 390–393 (2016).
- 504 57. R Core Team. R: A Language and Environment for Statistical Computing. (2013).
- 505 58. Arbuckle, J. L. Amos (Version 23.0) [Computer Program]. (2014).
- 506

## 507 **Acknowledgements**

508 We warmly thank Jose M. Montoya, Delphine Legrand and Jérôme G. Prunier for  
509 their valuable comments on a previous version of the manuscript. We thank Lucas  
510 Mignien, Kéoni Saint-Pe and Yoann Buoro for their help during the experimental  
511 work. AR was financially supported by a doctoral scholarship from the Université  
512 Fédérale de Toulouse. This work was undertaken at SETE and EDB, which is part of  
513 the “Laboratoire d’Excellence” (LABEX) entitled TULIP (ANR-10-LABX-41).

514

515 **Authors' contributions:** A.R and S.B conceived the study. A.R and L.DG carried out  
516 the experiment with contributions from S.B and J.C. A.R performed the statistical  
517 analyses. A.R, S.B and J.C interpreted and discussed the results. A.R, S.B and J.C  
518 wrote the article, and all authors made corrections.

519 **Table 1:** Causal pathways between variations in intraspecific traits (body mass<sub>adults</sub>  
 520 and growth rate<sub>adults</sub>), temperature and ecological and evolutionary parameters  
 521 obtained from path analyses.  
 522

| Response                      | Effect                        | Path coefficient | S.E.  | <i>p</i> -value |
|-------------------------------|-------------------------------|------------------|-------|-----------------|
| Growth rate <sub>adults</sub> | Body mass <sub>adults</sub>   | -0.674           | 0.093 | < 0.001         |
| Cladocera abundance           | Growth rate <sub>adults</sub> | -0.341           | 0.111 | 0.002           |
|                               | Copepod abundance             | 0.339            | 0.11  | 0.002           |
| Size Cladocera                | Bivalve abundance             | 0.428            | 0.114 | < 0.001         |
| Copepoda abundance            | Growth rate <sub>adults</sub> | 0.37             | 0.153 | 0.016           |
|                               | Bivalve abundance             | 0.311            | 0.113 | 0.006           |
|                               | Body mass <sub>adults</sub>   | 0.477            | 0.153 | 0.002           |
| Bivalvia abundance            | Temperature                   | 0.441            | 0.113 | < 0.001         |
| Abiotic parameters            | Body mass <sub>adults</sub>   | -0.289           | 0.124 | 0.019           |
|                               | Filamentous algae             | -0.644           | 0.092 | < 0.001         |
|                               | Growth rate <sub>adults</sub> | -0.194           | 0.124 | 0.116           |
| Pelagic prod.                 | Prod. benthic                 | 0.244            | 0.12  | 0.043           |
| Benthic prod.                 | Growth rate <sub>adults</sub> | -0.522           | 0.139 | < 0.001         |
|                               | Bivalvia abundance            | -0.228           | 0.118 | 0.054           |
|                               | Body mass <sub>adults</sub>   | -0.486           | 0.139 | < 0.001         |
|                               | Temperature                   | 0.292            | 0.132 | < 0.001         |
|                               | Filamentous algae             | 0.239            | 0.12  | 0.047           |
| Decomposition rate            | Body mass <sub>adults</sub>   | 0.375            | 0.132 | < 0.001         |
|                               | Temperature                   | 0.532            | 0.096 | < 0.001         |
| Filamentous algae             | Temperature                   | 0.554            | 0.118 | < 0.001         |
|                               | Bivalvia abundance            | -0.207           | 0.123 | 0.092           |
|                               | Copepoda abundance            | -0.168           | 0.110 | 0.126           |
| Survival <sub>juveniles</sub> | Size Cladocera                | -0.195           | 0.123 | 0.112           |
|                               | Temperature                   | -0.183           | 0.123 | 0.135           |

|                                     |                                  |        |       |         |
|-------------------------------------|----------------------------------|--------|-------|---------|
| Growth rate <sub>juveniles</sub>    | Body mass <sub>adults</sub>      | 0.479  | 0.130 | < 0.001 |
|                                     | Growth rate <sub>adults</sub>    | 0.725  | 0.125 | < 0.001 |
|                                     | Prod. benthic                    | 0.332  | 0.092 | < 0.001 |
|                                     | Cladocera abundance              | 0.250  | 0.089 | 0.005   |
|                                     | Survival <sub>juveniles</sub>    | -0.566 | 0.084 | < 0.001 |
|                                     | Decomposition rate               | -0.234 | 0.093 | 0.012   |
| Body condition <sub>juveniles</sub> | Bivalve abundance                | -0.175 | 0.073 | 0.016   |
|                                     | Survival <sub>juveniles</sub>    | 0.556  | 0.087 | < 0.001 |
|                                     | Growth rate <sub>juveniles</sub> | 0.941  | 0.083 | < 0.001 |

---

524 **Fig. 1.** Experimental design used to test the ecological (phase 1) and evolutionary  
525 (phase 2) effects of intraspecific variation among adult minnows (*Phoxinus phoxinus*)  
526 and warming.

527

528 **Fig. 2. Comparison of the ecological and evolutionary effects of intraspecific**  
529 **variation and warming. (a)** Eta squared ( $\eta^2$ ) effect size of the intraspecific variation  
530 among adults and temperature on ecological (green) and evolutionary (blue)  
531 dynamics. Error bars represent  $\pm 1$  SE. **(b)** Delta of effect sizes ( $\eta^2$ ) of intraspecific  
532 variation and temperature on ecological and evolutionary parameters. Positive values  
533 indicate a higher effect of intraspecific variation, and negative values indicate a higher  
534 effect of temperature.

535

536 **Fig. 3. Effects of intraspecific trait variation and warming on ecological and**  
537 **evolutionary dynamics. (a)** Representation of the simplified path analysis linking  
538 intraspecific trait variation among adult minnows, temperature, and ecological and  
539 evolutionary dynamics. The covariance structure of this simplified path model, which  
540 contains both ecological and evolutionary dynamics, did not differ from that of the  
541 data ( $\chi^2 = 65.373$ , d.f = 72,  $p = 0.696$ ), indicating that the data were well supported by  
542 the model. The arrow line width is proportional to the  $\beta$  path coefficients (brown and  
543 pink arrows represent positive and negative values, respectively), and the dotted lines  
544 represent indirect effects of intraspecific variation on evolutionary parameters. **(b)**  
545 Cumulated absolute  $\beta$  path coefficients extracted from the simplified path analysis  
546 depicting the direct (filled) and indirect (hatched) relationships between intraspecific  
547 trait variation among adult minnows, temperature, ecological dynamics (green) and  
548 evolutionary dynamics (blue). Note that the direct effects of intraspecific variation on

549 evolutionary dynamics are not true direct effects (because the adult fish were removed  
550 before phase 2 of the experiment) but instead reveal unmeasured causal relationships.  
551 # = *abundance*.



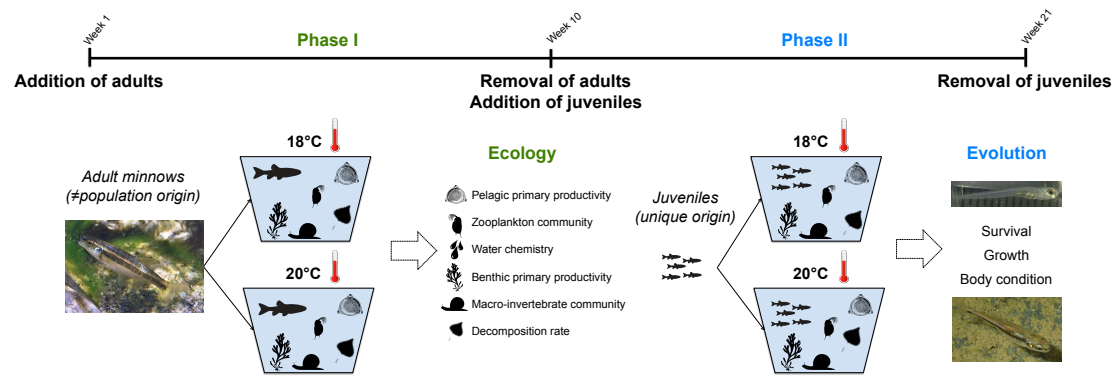

552

553 **Fig. 1.**

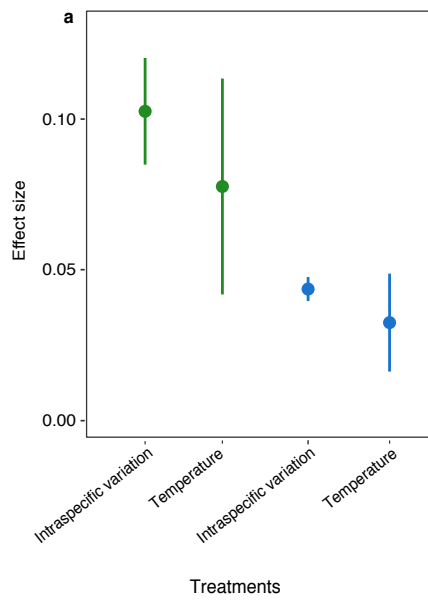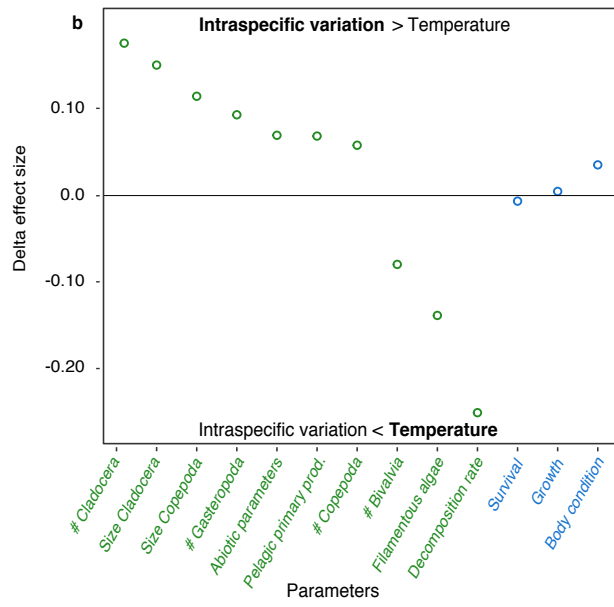

554

555 **Fig. 2.**

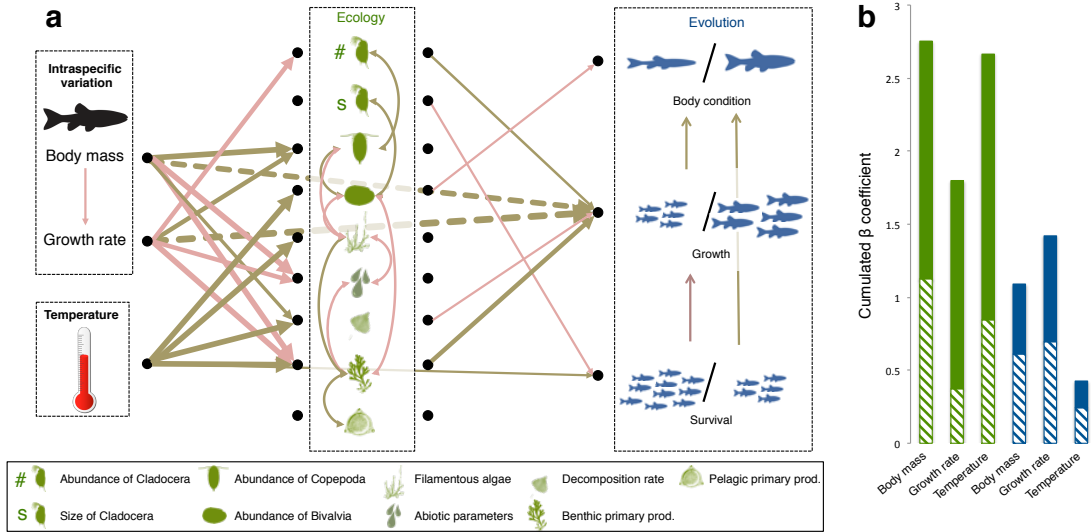

556

557

558 **Fig. 3.**
